# Supplementary material for: Assessing universality of DNA barcoding in geographically isolated selected desert medicinal species of Fabaceae and Poaceae
Source: PeerJ. 2018 Mar 13;6:e4499. doi: 10.7717/peerj.4499 (PMC5855882; doi:10.7717/peerj.4499)
Supplement: Supplemental Information 13 [file peerj-06-4499-s013.xlsx]

## Sheet: Sheet1
K2P(%)	intraspecific	interspecific
< 0.00	36
0.00-0.5	8
0.5-1.0		18
1.0-1.5
1.5-2.0		36
2.0-2.5		18
