# Supplementary material for: Assessing universality of DNA barcoding in geographically isolated selected desert medicinal species of Fabaceae and Poaceae
Source: PeerJ. 2018 Mar 13;6:e4499. doi: 10.7717/peerj.4499 (PMC5855882; doi:10.7717/peerj.4499)
Supplement: Supplemental Information 17 [file peerj-06-4499-s017.xlsx]

## Sheet: Sheet1
K2P(%)	intraspecific	interspecific
< 0.00	30
0.00-0.5	18	18
0.5-1.0
1.0-1.5
1.5-2.0		54
